# Supplementary material for: The MALAT1 gene polymorphism and its relationship with the onset of congenital heart disease in Chinese
Source: PubMed Central journal article supplement (PMC6048208; doi:10.1042/bsr20171381), 2018-05-22

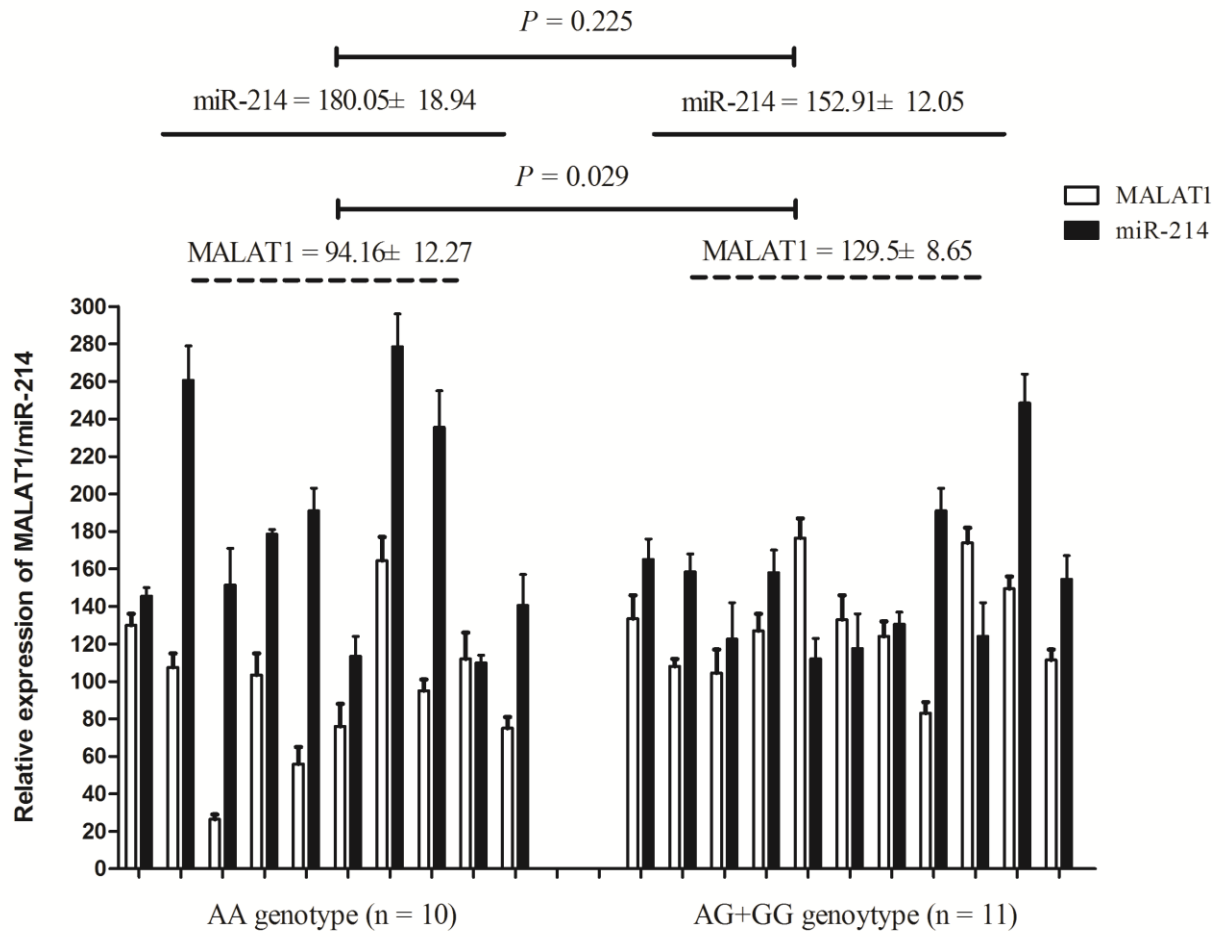

Supplement: bsr20171381_Supp1.pdf [file bsr20171381_Supp1.pdf]
